# Supplementary material for: How Accurate and Consistent Are Large Language Models in Restorative Dentistry Questions? A Cross-Sectional Test-Retest Study
Source: Research Square preprint supplement (doi:10.21203/rs.3.rs-8561237/v1), 2026-02-02
Supplement: Supplementary file 1 [file ba26a6f73922c1711549fabc.docx]

**RESTORATİVE DENTİSTRY-RELATED QUESTIONS IN THE TURKISH DENTAL SPECIALTY EXAMINATION (DUS)**

1. MOD restorasyon gerçekleştirilen bir hastada görülen postoperatif hassasiyetin başlıca nedeni aşağıdakilerden hangisidir?
   1. Materyalin yeterince kondanse edilmemesi
   2. Oklüzal embrazürün yanlış işlenmesi
   3. Matriksin uygun olmayan şekilde çıkarılması
   4. Aksiyo-pulpal köşenin yuvarlatılmaması
   5. Restorasyonun aşırı derecede işlenmesi

Doğru cevap: A

1. Aşağıdakilerden hangisi, amalgam restorasyonların uzun süre kullanımını kısıtlayan etkenlerden biri değildir?
   1. Restorasyonun kırılması
   2. Korozyon
   3. Aşınma
   4. Sekonder çürük
   5. Hassasiyet

Doğru cevap: C

1. Dentin çürüğünde, operatif işlemler sırasında uzak- laştırılması gerekmeyen ve bakteri içermeyen tabakaya ne ad verilir?
   1. Bulanık tabaka
   2. Etkilenmiş dentin tabakası
   3. Enfekte dentin tabakas
   4. Nekrotik dentin tabakas
   5. Denatüre olmuş kollajen tabakası

Doğru cevap: B

1. Dişlerde görülen renklenmelerden hangisi veneer uygulama endikasyonlarından biridir?
2. Diş kolelerinde Nasmyth zarı varlığı
3. Sigara içenlerde görülen nikotin lekelenmeler
4. Kromojenik mikroorganizmaların oluşturduğu lekelenmeler
5. Kahve ve çay gibi içecekler yüzünden oluşan lekelenmeler
6. Gelişim döneminde fazla alınan tetrasiklinler yüzünden oluşan renklenmeler

Doğru cevap: E

1. Aşağıdakilerden hangisi, dentin hassasiyeti tedavisinde kullanılmaz?
2. Potasyum okzalat
3. Glutaraldehit
4. Sodyum perborat
5. Kalsiyum fosfat
6. Potasyum nitrat

Doğru cevap: C

1. Aşağıdaki kompozitlerden hangisinin polimerizasyon büzülme oranı en fazladır?
2. Akıcı kompozit
3. “Packable” kompozit
4. Nanofil kompozit
5. Hibrit kompozit
6. Mikrofil kompozit

Doğru cevap: A

1. Lizozim aşağıdaki mekanizmalardan hangisiyle plakta oluşan bakteri çeşitliliğini kontrol eder?
2. Oligosakkaritlerin oluşumunu artırarak
3. Bakteri yapışmasını inhibe eden serbest yağ asitlerinin oluşumunu tetikleyerek
4. Bazı demire bağımlı bakterilerin gelişimini inhibe ederek
5. Plak formasyonunu baskılayan peptidoglikanları aktive ederek
6. Presipitasyon yoluyla bakteri büyümesini yavaşlatarak

Doğru cevap: D

1. Aşağıdaki cihazlardan hangisi, lazer floresans özelliğiyle çürük teşhisine yardımcı olur?
2. DIAGNOdent
3. DIFOTI
4. QLF
5. ECM
6. TACT

Doğru cevap: A

1. Hidrofilik ve hidrofobik uçları olan, özellikle amalgam bonding sistemlerde tercih edilen monomer aşağıdakilerden hangisidir?
2. TEG-DMA
3. Bis-GMA
4. UDMA
5. HEMA
6. 4-META

Doğru cevap: E

1. Kompozitlerde polimerizasyon başlatıcısı olarak kullanılan kamforokinonun, ışığı çoğunlukla absorbe ettiği dalga boyu aşağıdakilerden hangisidir?
2. 274 nm
3. 374 nm
4. 474 nm
5. 574 nm
6. 674 nm

Doğru cevap: C

1. Kök yüzeyi çürüğünde en sık görülen mikroorganizma aşağıdakilerden hangisidir?
2. Actinomyces
3. Lactobacillus
4. Veillonella
5. Streptococcus mutans
6. Streptococcus sanguis

Doğru cevap: A

1. Hipokalsifiye minenin özellikleri aşağıdakilerin han gisinde doğru verilmiştir?
2. Yumuşak ve translusent
3. Sert ve translusent
4. Yumuşak ve opak
5. Sert ve opak
6. Çok sert ve translusent

Doğru cevap: D

1. Aşağıdaki kaide materyallerinden hangisinin kompresyon kuvvetlerine karşı dayanımı en fazladır?
   1. Polikarboksilat siman
   2. Çinko oksit ojenol
   3. Rezin modifiye cam iyonomer siman
   4. Çinko fosfat siman
   5. Cam iyonomer siman

Doğru cevap: C

1. Aşağıdakilerden hangisi diş preparasyonlarında nokta açısını tanımlar?
   1. Kavite duvarı ile dişin dış yüzeyi arasında oluşan açıdır.
   2. Kavite içerisinde farklı yönlenen üç yüzeyin birleşim açısıdır.
   3. Kavite içerisinde fasiyal ve pulpal duvarların birleşim açısıdır.
   4. Kavite içerisinde pulpal ve aksiyal duvarların birleşim açısıdır.
   5. Kavite içerisinde aksiyal ve gingival duvarların birleşim açısıdır.

Doğru cevap: B

1. Ağızda çok sayıda dişte görülen, yumuşak ve açık renkli formdaki çürük lezyonları aşağıdakilerden hangisidir?
   1. Rezidüel çürük lezyonları
   2. Kronik çürük lezyonları
   3. Başlangıç çürük lezyonları
   4. Sekonder çürük lezyonları
   5. Rampant çürük lezyonları

Doğru cevap: E

1. Aşağıdakilerden hangisi çürük, abrazyon, erozyon, atrizyon veya operatif prosedürler gibi lokal uyaran lara karşı oluşturulan dentin tiplerinden biri değildir?
2. Sekonder dentin
3. Reaksiyoner dentin
4. Reparatif dentin
5. İrregüler dentin
6. İritasyon dentini

Doğru cevap: A

1. Posterior dişlerde kompozit dolgu maddesi kullanı mı için aşağıdakilerden hangisi kontrendikedir?
   1. Mine dokusu ile sınırlı küçük-orta boy lezyonlar
   2. Premolar ve birinci molar dişlerin estetik restorasyonları
   3. Geriye kalan zayıf diş yapısını güçlendirmek üzere kullanılan bazı büyük restorasyonlar
   4. Ağır oklüzal streslerin varlığı
   5. Kuron altyapısı olarak kullanılan bazı restorasyonlar

Doğru cevap: D

1. Amalgam alaşımlarda diğer elementlerin oksidasyonunu engelleyen ve gecikmiş ekspansiyona neden olan element aşağıdakilerden hangisidir?
   1. Gümüş
   2. Kalay
   3. Bakır
   4. Demir
   5. Çinko

Doğru cevap: E

1. Floridlerin çürük önleme mekanizmaları ile ilgili aşa- ğıdaki ifadelerden hangisi yanlıştır?
2. Tükürükteki floroapatitin diş sert dokularına çökel- mesini artırır.
3. İntraselüler polisakkarit oluşumunu artırır.
4. Kavitasyon göstermeyen başlangıç çürük lezyonlarının remineralizasyonunu hızlandırır.
5. Glikoziltransferazın enzimatik üretimini inhibe eder.
6. Bakteriyal adezyonu azaltır.

Doğru cevap: B

1. Tamamlanmış diş preparasyonunda hekim tarafından kasten veya kazayla bırakılan çürük tipi aşağıdakilerden hangisidir?
2. Aktif çürük
3. Gizli çürük
4. Kök yüzey çürüğü
5. Sekonder çürük
6. Rezidüel çürük

Doğru cevap: E

1. Dentin çürüğü ile ilgili aşağıdaki ifadelerden hangisi yanlıştır?
   1. Çürük; dentinde ağrı, hassasiyet, demineralizasyon ve remineralizasyon gibi farklı tepkiler oluşturabilir.
   2. Çürüğün dentinde ilerlemesi mineye göre çok yavaştır.
   3. Mine-dentin sınırı, çürük ataklarına karşı en az dirence sahiptir.
   4. Dentin, asitlerin ve çeşitli minerallerin geçişine izin veren kanallar içerir.
   5. Çapraz kesitlerde dentin çürüğü, mine-dentin sınırına doğru genişleyen, apeksi pulpaya bakan "V" şeklindedir.

Doğru cevap: B

1. Aşağıdakilerin hangisinde, mine çürüğünün tabakaları, en derin tabakadan başlayarak doğru olarak sıralanmıştır?
2. Yüzeyel tabaka – Karanlık tabaka – Lezyon gövdesi - Saydam tabaka
3. Saydam tabaka – Lezyon gövdesi – Yüzeyel tabaka - Karanlık tabaka
4. Yüzeyel tabaka – Lezyon gövdesi – Karanlık tabaka - Saydam tabaka
5. Saydam tabaka – Karanlık tabaka – Lezyon gövdesi - Yüzeyel tabaka
6. Karanlık tabaka – Saydam tabaka – Lezyon gövdesi - Yüzeyel tabaka

Doğru cevap: D

1. Dentin dokusu ile ilgili aşağıdaki ifadelerden hangisi yanlıştır?
   1. Sementten daha az mineralizedir.
   2. Ağırlıkça yaklaşık % 75’i inorganiktir.
   3. Ağırlıkça yaklaşık % 20’si organiktir.
   4. Mineden daha az mineralizedir.
   5. Mineral içeriği yaşla birlikte artar.

Doğru cevap: A

1. Dentinde birim alana düşen tübül sayısı ve çapı ile ilgili aşağıdaki ifadelerden hangisi doğrudur?
   1. Mine-dentin sınırına doğru sayıları azalır, çapları artar.
   2. Mine-dentin sınırına doğru sayıları artar, çapları azalır.
   3. Pulpaya yaklaştıkça sayıları artar, çapları artar.
   4. Pulpaya yaklaştıkça sayıları artar, çapları azalır.
   5. Pulpaya yaklaştıkça sayıları azalır, çapları artar.

Doğru cevap: C

1. Mine geçirgenliği ile ilgili aşağıdaki ifadelerden hangisi yanlıştır?
   1. Mine matürasyonu ile artar.
   2. Su, geçirgenlikte önemli rol oynar.
   3. Kristaller arası boşluklar geçirgenlik için önemlidir.
   4. Mine lamelleri geçirgenlikte önemli yollardır.

E) Yaşla azalır.

Doğru cevap: A

1. I. Subtransparan dentin
2. Transparan dentin
3. Turbid dentin
4. Enfekte dentin

Yukarıdaki çürük dentin tabakalarının hangilerinde bakteri bulunur?

- 1. Yalnız IV
  2. III ve IV
  3. I, II ve IV
  4. I, III ve IV
  5. II, III ve IV

Doğru cevap: B

1. Atravmatik restoratif tedavi uygulamalarında aşağıdaki dental materyallerden hangisi kullanılır?
   1. Non-gama 2 amalgam
   2. Nano-hibrid kompozit
   3. Akışkan kompozit
   4. Geleneksel cam iyonomer
   5. Kompomer

Doğru cevap: D

1. Aşağıdakilerden hangisi, indirekt kompozit ve seramik restorasyonlardaki tamir işleminde kullanılmaz?
2. Mekanik pürüzlendirme
3. Alüminyum oksit kumlama
4. Hidroklorik asit
5. Silanlar
6. Hidroflorik asit

Doğru cevap: C

1. Aşağıdakilerden hangisi, amalgam restorasyonların avantajlarından biri değildir?
2. Oligodinamik etkiye sahip olması
3. Yüksek basınca dayanıklı olması
4. Kompozit restorasyonlardan daha ucuz olması
5. Uzun dönem klinik araştırma sonuçlarının başarılı olması
6. Kavite preparasyonunun daha kolay olması

Doğru cevap: E

1. Pelikıl ile ilgili aşağıdaki ifadelerden hangisi yanlıştır?
2. Kompozisyonunun başlangıç mikroflora kompozisyonuna etkisi yoktur.
3. Erozyona karşı seçici geçirgenlik sağlar.
4. Minenin yüzey altı demineralizasyonunu inhibe eder.
5. Oluşması için bakteri gerekmez.
6. Majör içeriklerinden biri tükürük glikoproteinleridir.

Doğru cevap: A

1. Anterior dişlere direkt kompozit veneer uygulanması sırasında yapılması gereken ilk işlem aşağıdakilerden hangisidir?
   1. Rubber-dam'in yerleştirilmesi
   2. Yüzeyel minenin kalın grenli bir elmas frez yardımıyla aşındırılması
   3. Kompozit rezinin renginin belirlenmesi
   4. Asitle pürüzlendirme
   5. Bağlayıcı ajan uygulanması

Doğru cevap: C

1. Aşağıdakilerden hangisi, "self-etch" dentin bağlayıcı sistemlerin dezavantajlarından biridir?
   1. Asidik monomerler içerebilmeleri
   2. Klinikte uygulanmalarının zor olması
   3. Postoperatif hassasiyete neden olmaları
   4. Prepare edilmemiş mineye bağlanma güçlerinin az olması
   5. Dentin yüzeyindeki smear tabakasını tamamen kaldırmamaları

Doğru cevap: D

1. Aşağıdaki kompozit rezin restorasyonların hangisinde bizotaj işlemi kontrendikedir?
   1. Sınıf I kavitelerin oklüzal marjinleri
   2. Sınıf II kavitelerin lingual proksimal marjinleri
   3. Sınıf II kavitelerin bukkal proksimal marjinleri
   4. Sınıf III kavitelerin ulaşılabilir mine marjinleri
   5. Sınıf V kavitelerin mine marjinleri

Doğru cevap: A

1. Başlangıç lezyonlarının özellikleriyle ilgili aşağıdaki ifadelerden hangisi yanlıştır?
   1. Diş yüzeyi kurutulduğunda açığa çıkan tebeşirimsi, beyaz opak alanlardır.
   2. Demineralizasyon nedeniyle aşırı yüzey altı porozite yüzünden saydamlığını kaybetmiştir.
   3. Klinik tanıda mine hipokalsifikasyonları ile karıştırılabilir.
   4. Saydam, karanlık, lezyon gövdesi ve yüzeyel olmak üzere 4 tabakası vardır.
   5. Mine prizmalarının kristal yapısı bozulduğundan remineralize olamaz.

Doğru cevap: E

1. Farklı ışık kaynakları altında bir objenin renginde izlenen değişikliği aşağıdakilerden hangisi tanımlar?
2. Tiksotropik etki
3. Floresans etkisi
4. Refleksiyon etkisi
5. Metamerizm etkisi
6. Refraksiyon etkisi

Doğru cevap: D

1. I.Altın

II.Amalgam

III.Fissür örtücü

Yukarıdaki materyallerin termal genleşme katsayılarının büyükten küçüğe doğru sırası aşağıdakilerden hangisidir?

1. I – II – III
2. I – III – II
3. II – I – III
4. II – III – I
5. III-II-I

Doğru cevap: E

1. Aşağıdaki simanlardan hangisinin çözünürlüğü en düşüktür?
2. Hibrid iyonomer
3. Çinko oksit ojenol
4. Çinko fosfat
5. Çinko polikarboksilat
6. Cam iyonomer

Doğru cevap: A

1. Kompozit rezinleri polimerize etmek amacıyla kullanılan ışık cihazlarıyla ilgili aşağıdaki ifadelerden hangisi yanlıştır
   1. Halojen ışık cihazları, 380-520 nm dalga boyunda ışık üretirler.
   2. Günümüzde en sık kullanılan ışık cihazları, ultraviyole ışık cihazlarıdır.
   3. Plazma ark ışık cihazları, 3-8 saniyede polimerizasyonu gerçekleştirir.
   4. LED ışık cihazlarının lamba ömürleri, halojen ışık cihazlarının lamba ömürlerinden daha fazladır.
   5. Plazma ark ışık cihazlarının oluşturduğu polimerizasyon, kompozit yapıyı olumsuz etkiler.

Doğru cevap: B

1. Mine ve dentin dokularında demineralizasyonun başlaması için kritik pH değerleri aşağıdakilerden hangisidir?

Mine Dentin

1. 3,5 5,5
2. 3,5 6,2
3. 5,5 6,0
4. 5,5 6,2
5. 6,0 6,5

Doğru cevap: D

1. Aşağıdaki durumların hangisinde, direkt pulpa tedavisi yapılmamalıdır?
   1. Diş vital olduğunda ve spontan ağrı hikâyesi olmadığında
   2. Sıcak veya soğuk uyaranlarla oluşan ağrı, uyaranlar ortadan kalktığında devam etmediğinde
   3. Periapikal radyografta endodontik kaynaklı periradiküler bir lezyon olmadığında
   4. Daimî restorasyon yapımı ile bakteriler ortamdan uzaklaştırılabildiğinde
   5. Pulpa, çürük ile ekspoze olduğunda

Doğru cevap: E

1. Aşağıdakilerden hangisi, dişler temizlendikten hemen sonra dişe yapışan öncü bakterilerden biri değildir?
2. Streptococcus sanguis
3. Streptococcus oralis
4. Actinomyces naeslundii
5. Streptococcus mitis
6. Lactobacillus

Doğru cevap: E

1. Aşağıdaki simanlardan hangisinin özelliği, likitine ortho-etoksibenzoik asit (EBA) ilavesiyle geliştirilmiştir?
2. Çinko fosfat
3. Polikarboksilat
4. Çinko oksit ojenol
5. Cam iyonomer
6. Kalsiyum fosfat

Doğru cevap: C

1. Aşağıdaki simanlardan hangisinin özelliği, likitine ortho-etoksibenzoik asit (EBA) ilavesiyle geliştirilmiştir?
2. Çinko fosfat
3. Polikarboksilat
4. Çinko oksit ojenol
5. Cam iyonomer
6. Kalsiyum fosfat

Doğru cevap: B

1. Probiyotiklerin çürük önleyici etkisi aşağıdakilerden hangisidir?
   1. Karyojenik bakterilerle yer değiştirirler.
   2. Plak pH’sini düşürürler.
   3. Bakterilerin hücre duvarını yıkarlar.
   4. Tükürükte kalsiyum iyon konsantrasyonunu artırırlar.
   5. Minenin yapısını güçlendirirler.

Doğru cevap: A

45. Diş hassasiyetini azaltmak amacıyla üretilen diş macunlarında, aşağıdakilerden hangisi bulunur?

1. Kalsiyum karbonat
2. Sodyum lauril sülfat
3. Hidroksietil selüloz
4. Stronsiyum klorid
5. Triklosan

Doğru cevap: D

46. Aşağıdakilerden hangisi, ağız kuruluğunun nedenlerinden biri değildir?

1. Baş boyun bölgesinden radyoterapi alınması
2. Skleroderma, sarkoidoz gibi sistemik hastalıkların varlığı
3. Antidepresan, antihistaminik gibi ilaçların uzun süreli kullanımı
4. Beslenme yetersizliği
5. Akut nekrotizan ülseratif gingivitis

Doğru cevap: E

47. Aşağıdaki kompozit rezinlerden hangisinin fazla miktarda strese dayanıklı olmaması nedeniyle sınıf IV kavitelerin restorasyonları amacıyla tek başlarına kullanılması önerilmemektedir?

1. Hibrid kompozitler
2. Mikrofil kompozitler
3. Nanofil kompozitler
4. Mikrohibrid kompozitler
5. Nanohibrid kompozitler

Doğru cevap: B

48. Yetişkin bir bireyde, ortalama uyarılmamış tükürük akış hızı miktarı aşağıdakilerden hangisinde doğru olarak verilmiştir?

1. 0,1 – 0,2 mL/dakika
2. 0,3 – 0,5 mL/dakika
3. 0,6 – 0,7 mL/dakika
4. 0,8 – 0,9 mL/dakika
5. 1 – 2 mL/dakika

Doğru cevap: B

1. Hiposalivasyonda, uyarılmamış tükürük miktarı, dakikada kaç ml’den az olmalıdır?
2. 0,01
3. 0,10
4. 0,25
5. 0,35
6. 0,70

Doğru cevap: B

1. Aşağıdakilerden hangisi, biyofilm oluşumunu engellemek için kullanılan katyonik ajanlardan biri değildir?
2. Klorheksidin
3. Setil pridinyum klorid
4. Delmopinol
5. Benzalkonyum klorid
6. Triklosan

Doğru cevap: E

1. Mine matriks proteinlerini kodlayan genlerdeki defektler sonucu; minenin hipoplazisi, hipomineralizasyonu veya hipomatürasyonuna neden olan anomali, aşağıdakilerden hangisidir?
   1. Turner dişi
   2. Amelogenesis imperfekta
   3. Mine opasitesi
   4. Hutchinson kesicisi
   5. Mine incise

Doğru cevap: B

1. Aşağıdaki monomer tiplerinden hangisi, polimerizasyon reaksiyonu sırasında gösterdiği “halka açılımlı polimerizasyon” sayesinde, büzülme oranını azaltması amacıyla geliştirilmiştir?
2. Bisfenol glisidin metakrilat (Bis-GMA)
3. Üretan dimetakrilat (UDMA)
4. Trietilen glikol dimetakrilat (TEG-DMA)
5. Metil metakrilat (MMA)
6. Siloran

Doğru cevap: E

1. Aşağıdaki restorasyon tiplerinden hangisinde, kavite preparasyonu sırasında, kaviteyi çevreleyen tüm mine kenarlarına yaklaşık 40 açıyla bizotaj uygulanır?
   1. Sınıf II kompozit restorasyon
   2. Sınıf II amalgam restorasyon
   3. Sınıf II seramik inley restorasyon
   4. Sınıf II kompozit inley restorasyon
   5. Sınıf II altın alaşımlı döküm inley restorasyon

Doğru cevap: E

1. Black sınıflamasına göre, aşağıdaki kavite tiplerinin hangisinde, kompozit restorasyon yapımı sırasında, konfigürasyon faktörü (C faktör) oranı en düşük olur?
   1. MOD kavite
   2. Sınıf I kavite
   3. Sınıf II kavite
   4. Sınıf III kavite
   5. Sınıf IV kavite

Doğru cevap: E

1. Üst anterior bölgede, santral dişlerin arasındaki diastemanın direkt estetik restorasyonlarla kapatılması işleminde kullanılması gereken adeziv aşağıdakilerden hangisidir?
2. Üç aşamalı etch and rinse adezivler
3. İki aşamalı self-etch adezivler
4. Tek aşamalı self-etch adezivler
5. Dual-cure adezivler
6. Cam iyonomer adezivler

Doğru cevap: A

1. Dental amalgamların antibakteriyel etki göstermesinde, aşağıdaki bileşenlerden hangisinin rolü yoktur?
2. Bakır
3. Cıva
4. Çinko
5. Gümüş
6. Kurşun

Doğru cevap: E

1. Aşağıdaki kimyasal ajanlardan hangisi, iç veya dış kaynaklı diş renklenmelerinin tedavisinde kullanılmaz?
   1. Hidtojen peroksit
   2. Sodyum perborat
   3. Sodyum askorbat
   4. Karbamid peroksit
   5. Hidroklorik asit

Doğru cevap: C

1. Dental simanlar, matriks bağlanma mekanizmalarına göre sınıflandırıldığında, çinko oksit ojenolün bulunduğu grup aşağıdakilerden hangisidir?
   1. Fosfatlar
   2. Fenolatlar
   3. Polikarboksilatlar
   4. Rezinler
   5. Rezin modifiyeler

Doğru cevap: B

1. Aşağıdakilerden hangisi çürük oluşumunda ikincil etken olarak rol oynar?
   1. Bakteri
   2. Zaman
   3. Diş
   4. Sosyoekonomik durum
   5. Fermente olabilen karbonhidratlar

Doğru cevap: D

1. Koruyucu diş hekimliğinde kullanılan aşağıdaki yapay tatlandırıcılardan hangisinin besleyici özelliği yoktur?
   1. Ksilitol
   2. Mannitol
   3. Sorbitol
   4. Sakkarin
   5. İzomalt

Doğru cevap: D

1. Premolar ve molar dişlerin ara yüzeylerinde oluşan çürüklerin teşhisi amacıyla kullanılan en güvenilir radyografi tekniği aşağıdakilerden hangisidir?
   1. Periapikal radyografi tekniği
   2. Panoramik radyografi tekniği
   3. Bite-wing radyografi tekniği
   4. Le Master radyografi tekniği
   5. Lateral sefalografi tekniği

Doğru cevap: C

1. Dentine adezyonda aşağıdakilerden hangisinin kollajen yıkımını engelleyici etkisi vardır?
   1. Glutaraldehit
   2. Klorheksidin
   3. Florid
   4. MDPB
   5. Paraben

Doğru cevap: B

1. Dişin servikalinde, labial yüzeyde, kök ve kurona ilerlemiş geniş bir çürük varlığında aşağıdaki preparasyon tiplerinden hangisi tercih edilir?
2. Geleneksel sınıf V preparasyon
3. Kök bölgesine geleneksel, kurona bizotajlı geleneksel sınıf V preparasyon kombinasyonu
4. Kök bölgesine bizotajlı geleneksel, kurona geleneksel sınıf V preparasyon kombinasyonu
5. Bizotajlı geleneksel sınıf V preparasyon
6. Modifiye sınıf V preparasyon

Doğru cevap: B

1. Yüksek çürük riskine sahip yaşlı bireylerde kök yüzeylerinde oluşan yaygın lezyonların restorasyonunda seçilebilecek en uygun restoratif materyal aşağıdakilerden hangisidir?
   1. Amalgam
   2. Akışkan kompozit
   3. Sıkıştırılabilen kompozit
   4. Hibrit kompozit
   5. Rezin modifiye cam iyonomer siman

Doğru cevap: E

1. Üst anterior bölge restorasyonu yapılırken ideal estetik bir görünüm için orta hattan başlayarak distaldeki dişin görünen genişliğinin, mezyalindeki dişin görünen genişliğine oranı ne olmalıdır?
2. 0,418
3. 0,518
4. 0,618
5. 0,718
6. 0,818

Doğru cevap: C

1. Zamanla antibakteriyel özelliğinin yanı sıra marjinal tıkama (seal) özelliği artan restoratif materyal aşağıdakilerden hangisidir?
2. Cam iyonomer simanlar
3. Cam karbomer restoratif materyal
4. Nanokompozitler
5. Dental amalgamlar
6. Kompomerler

Doğru cevap: D

1. Ağartma tedavileri sırasında oluşabilecek hassasiyetin önlenmesi için aşağıdakilerden hangisi tercih edilmez?
   1. Antiinflamatuvar ilaç kullanılması
   2. Ağartma tedavisi boyunca hassasiyet giderici diş macunlarının kullanılması
   3. Ağartıcı ajan uygulanmadan önce dişlere potasyum nitrat uygulanması
   4. Ağartma yapılacak dişlere lokal anestezi uygulanması
   5. Ağartma tedavisine başlamadan önce dişlere florid jel uygulanması

Doğru cevap: D

1. Aşağıdaki restoratif materyallerden hangisi, poliasit modifiye kompozit rezin yapısındadır?
2. Polikarboksilat siman
3. Cam iyonomer siman
4. Hibrit iyonomer siman
5. Kompozit
6. Kompomer

Doğru cevap: E

1. Aşağıdaki uyarılmamış tükürük akış hızı değerlerinin hangisi yetişkin bir birey için “şiddetli” tükürük azlığını ifade eder?
   1. <0,1 ml/dakika
   2. <0,3 ml/dakika
   3. <0,5 ml/dakika
   4. <0,7 ml/dakika
   5. <1 ml/dakika

Doğru cevap: A

1. Ortodontik tedavi sırasında oluşan beyaz nokta lezyonların, braketlerin sökülmesinden sonraki ilk tedavi basamağı aşağıdakilerden hangisi olmalıdır?
   1. Direkt restore edilmesi
   2. Yüksek florid içerikli remineralizasyon tedavisine başlanması
   3. Ağartma işlemi uygulanması
   4. Birkaç hafta diş macunu ile fırçalanarak lezyonların remineralize olmasının beklenmesi
   5. Air abrazyon ile yüzeyel renkli tabakanın uzaklaştırılması

Doğru cevap: D

1. Aşağıdakilerden hangisi, çürüksüz servikal lezyonların restorasyonuna karar verirken göz önünde bulundurulan faktörlerden biri değildir?
   1. Etiyolojik faktörün ortadan kaldırılmasına rağmen lezyon ilerlemesinin önlenememesi
   2. Lezyonun estetik olarak problem oluşturması
   3. Açığa çıkmış dentinin soğuk yiyecek ve içeceklere karşı aşırı hassas olması
   4. Lezyon derinliğinin dişin kuron-kök bütünlüğünü bozacak dereceye ulaşması
   5. Lezyona sahip dişin posterior bölgede bulunması

Doğru cevap: E

1. Self-etch adezivler ile ilgili aşağıdaki ifadelerden hangisi yanlıştır?
2. Asidik monomerlerin iyonizasyonu için hidrofilik formülasyon içerisine su ilave edilmiştir.
3. Ayrı bir asit uygulama basamağı yoktur.
4. Etch-and-rinse adezivlerin aksine self-etch adezivler hibrit tabakası içerisinde nanosızıntı gözlenmez.
5. Tek basamaklı self-etch adezivler polimerize edildik sonra yarı geçirgen bir membran gibi davranırlar.
6. Mineyi fosforik asit kadar etkin pürüzlendirmezler

Doğru cevap: C

1. Erişkin bir hastada;

I. dişte spontan ağrı hikâyesi olmaması,

II. periapikal radyografta endodontik kökenli lezyon olmaması,

III. pulpa canlılığı testi sırasında duyulan ağrının uzun sürmesi,

IV. dişin geri dönüşümsüz pulpit belirtisi göstermesi

durumlarının hangilerinde indirekt pulpa kaplaması yapılmamalıdır?

1. I ve II
2. I ve III
3. II ve III
4. II ve IV
5. III ve IV

Doğru cevap: E

1. Aşağıdaki kavite tiplerinden hangisinin kavite konfigürasyon faktörü (C faktörü) en yüksektir?
2. 44 nolu dişte açılan sınıf V kavite
3. 21 nolu dişin meziyalinde açılan sınıf IV kavite
4. 36 nolu dişte açılan sınıf II (OM) kavite
5. 36 nolu dişte açılan sınıf II (MOD) kavite
6. 26 nolu dişte açılan sınıf II (OM) kavite

Doğru cevap: A

1. Aşırı dentin hassasiyetiyle ilgili aşağıdaki ifadelerden hangisi yanlıştır?
2. Ozmotik uyaranlara bağlı olarak gelişebilir.
3. Keskin ve rahatsız edici bir ağrıdır.
4. Kimyasal erozyon sonucunda ortaya çıkabilir.
5. Mekanik abrazyon veya oklüzal streslerle ortaya çıkabilir.
6. Etken ortadan kalktığında devam eder

Doğru cevap: E

1. Amalgam restorasyonlardaki sülfitlerin korozyona uğrayarak yüzeyde siyah bir film tabakası oluşturması aşağıdakilerden hangisine örnektir?
2. Galvanik korozyon
3. Elektrokimyasal korozyon
4. Kimyasal korozyon
5. Yoğunlaşmış hücre korozyonu
6. Stres korozyonu

Doğru cevap: C

1. Devital diş beyazlatma işleminin en ciddi komplikasyonu aşağıdakilerden hangisidir?
2. İnternal kök rezorpsiyonu
3. Pulpa taşı oluşumu
4. Mine hipoplazisi
5. Eksternal kök rezorpsiyonu
6. Beyaz nokta lezyonu

Doğru cevap: D

1. Aşağıdaki ışık kaynaklarından hangisi, kompozit polimerizasyonunu en kısa sürede gerçekleştirir?
2. Ultraviyole
3. Quartz Tungsten Halojen
4. Light Emitting Diode
5. Floresan
6. Plazma ark

Doğru cevap: E

1. Bir populasyonun kümülatif çürük atağını ölçmekte kullanılan DMFS indeksinde "F" ne anlama gelir?
2. Daimî dişlerdeki çürüklü yüzey sayısı
3. Süt dişlerindeki dolgulu yüzey sayısı
4. Daimî dişlerdeki dolgulu yüzey sayısı
5. Süt dişlerindeki çürüklü yüzey sayısı
6. Daimî dişlerdeki eksik diş sayısı

Doğru cevap: C

1. Mine dokusuyla ilgili aşağıdaki ifadelerden hangisi yanlıştır?
2. Kendini tamir etme yeteneğine sahip değildir.
3. Sertliği, dentin sınırına yaklaştıkça azalır.
4. İyon ve molekül geçirgenliği yaşla birlikte artar.
5. Yapısal olarak mine prizmaları, bunları saran prizma kınları ve prizmaların arasında yer alan interprizmatik maddeden oluşur.
6. Elastik modülü yüksektir.

Doğru cevap: C

1. Aşağıdakilerden hangisi çürük profilaksisinde kullanılan spesifik ajanlardan biri değildir?
2. Aleksidin
3. Ksilitol
4. Bisfosfonat
5. Delmopinol
6. Heksetidin

Doğru cevap: C

1. Dişin servikal bölgesinde oluşan, oklüzal kuvvetlerin neden olduğu kama şeklindeki lezyonlara ne ad verilir?
2. Abrazyon
3. Atrizyon
4. Abfraksiyon
5. Erozyon
6. Fraktür

Doğru cevap: C

1. Dentin dokusunun gerekenden daha uzun süre asitle pürüzlendirilmesi aşağıdakilerin hangisine neden olmaz?
2. Dentine bağlanmanın daha kuvvetli olmasına
3. Daha fazla kollajen matriksin açığa çıkmasına
4. Postoperatif hassasiyete
5. Adezivin dentin kanallarına penetrasyonunun zorlaşmasına
6. Dentin kanal ağızlarının daha fazla genişlemesine

Doğru cevap: A

1. Restoratif diş hekimliğinde lazer kullanımıyla ilgili aşağıdaki ifadelerden hangisi yanlıştır?
2. Lokal anestezi gereksinimini azaltır.
3. Yüzeyde smear tabakası oluşturmaz.
4. Seçici çürük kaldırma özelliği nedeniyle minimal invaziv diş hekimliği konseptine uygundur.
5. Oluşturduğu düzgün kavite sınırları nedeniyle indirekt kavite preparasyonlarında tercih edilmelidir.
6. Direkt pulpa kuafajı tedavisinde dekontaminasyon ve koagülasyon için kullanılabilir.

Doğru cevap: D

1. Seramik indirekt restorasyonların tamirinde seramik yüzeyine mekanik bağlanmayı artırmak amacıyla en yaygın olarak kullanılan asit aşağıdakilerden hangisidir?
2. Fosforik asit
3. Hidroklorik asit
4. Hidroflorik asit
5. Sitrik asit
6. Propiyonik asit

Doğru cevap: C

1. Çürük lezyonunun bakterilerce invazyonu sonucunda odontoblast hücrelerinin canlılıklarını yitirdiği alanlarda dentinde tübüllerin boş kaldığı yapıya ne ad verilir?
2. Sklerotik dentin
3. Ölü alan
4. Reparatif dentin
5. Reaktif dentin sklerozu
6. Whitlockite kristalleri

Doğru cevap: B

1. Aşağıdakilerden hangisi kalsiyum hidroksitin direkt pulpa kaplamasındaki biyolojik etkileri arasında yer almaz?
2. Pulpa hücreleri üzerine kostik etki
3. Ağrı giderici etki
4. Dentin köprülerinin yeniden oluşmasını sağlama
5. Antibakteriyel etki
6. Odontoblast hücrelerini uyarma

Doğru cevap: B

1. Amalgamın stres altındaki plastik deformasyonuna ne ad verilir?
2. Creep
3. Flow
4. Korozyon
5. Genleşme
6. Elastisite

Doğru cevap: A

1. Kötü ağız hijyenine sahip ve çürük aktivitesi yüksek olan 15 yaşındaki hastada, mandibular sağ daimî birinci molar dişin distobukkal yüzeyinde servikal bölgede bulunan çürük lezyonunun restorasyonu gerekiyor. Yukarıda tanımlanan dişin restorasyonu için en uygun materyal aşağıdakilerden hangisidir?
2. Nanohibrit kompozit rezin
3. Geleneksel cam iyonomer siman
4. Nanofil kompozit rezin
5. Mikrohibrit kompozit rezin
6. Amalgam

Doğru cevap: B

1. İnaktif çürük lezyonlarına ilişkin özelliklerle ilgili aşağıdaki ifadelerden hangisi doğrudur?
2. Lezyon yüzey yapısı serttir; nemli veya kuru şartlarda açık sarı renkte ve translusent görünür.
3. Lezyon yüzey yapısı yumuşaktır; nemli ve kuru şartlarda koyu renkte ve opak görünür.
4. Lezyon yüzey yapısı serttir; kuru ortamda, beyaz nokta olarak görünürken nemli şartlarda görünmez.
5. Lezyon yüzey yapısı serttir; nemli ve kuru şartlarda koyu renkte ve opak görünür.
6. Lezyon yüzeyinde sertleşmiş yapıda kavitasyon oluşmuştur; nemli şartlarda translusent, kurutulunca koyu renkte ve opak görünür.

Doğru cevap: D

1. I. Fiber-optik transillüminasyon

II. Bite-wing radyografiler

III. Lazer floresans

Arayüz çürüklerinin teşhis edilmesinde, yukarıdaki tanı yöntemlerinden hangileri kullanılabilir?

1. Yalnız I
2. Yalnız II
3. I ve II
4. II ve III
5. I, II ve III

Doğru cevap: E

1. Tükürükte bulunan aşağıdaki organik komponentlerden hangisi, kalsiyum fosfatın spontan çökelmesini engeller?
2. Laktoferrin
3. Aglütinin
4. Statherin
5. Peroksidaz
6. Amilaz

Doğru cevap: C

1. Atrizyon, abrazyon, erozyon, travma ve bazı operatif işlemler gibi orta-düzey irritanlar karşısında odontoblastlar tarafından oluşturulan, normal dentin yapısına göre daha irregüler bir tübül yapısına sahip, pulpaya komşu olarak yapılan dentin tipi aşağıdakilerden hangisidir?
2. Primer dentin
3. Sekonder dentin
4. Sklerotik dentin
5. Tersiyer dentin
6. İntratübüler dentin

Doğru cevap: D

1. Aşağıdaki mikroorganizmalardan hangisi, dental plağın erken evrelerinde çürüksüz mine yüzeyinde diğer türlere göre daha baskındır?
2. Streptococcus sanguinis
3. Streptococcus salivarius
4. Streptococcus sobrinus
5. Lactobacillus fermentum
6. Actinomyces gerencseriae

Doğru cevap: A

1. Adeziv sistemlerde primerin içine aseton, etanol gibi çözücülerin ilave edilmesinin nedeni aşağıdakilerden hangisidir?
2. Adeziv monomerlerin akışkanlığını artırarak hibrit tabakasının kalınlığını artırmak
3. Oksijen inhibisyon tabakasının oluşumunu önlemek
4. Dental adezivlerin dişe kimyasal bağlantısını sağlamak
5. Dentinin yüzeyel demineralizasyonunu sağlamak
6. Dentindeki su ile yer değiştirerek monomerin kollajen ağına infiltrasyonunu kolaylaştırmak

Doğru cevap: E

1. Kompozit rezin restorasyonlarda görülen polimerizasyon büzülmesini aşağıdakilerden hangisi etkilemez?
2. Kompozit rezinin doldurucu oranı
3. Kullanılan adeziv sistemin tipi
4. Polimerizasyon yöntemi
5. Kavitenin şekli
6. Kompozit rezinin kaviteye yerleştirilme yöntemi

Doğru cevap: B

1. Renk seçimi yapılırken, renklerin farklı algılanmasını sağlayan “hue” değerinin saptanmasında aşağıdaki renklerden hangisi kullanılmaz?
2. Mavi
3. Sarı
4. Beyaz
5. Kırmızı
6. Yeşil

Doğru cevap: C

1. Erozyon riski yüksek hastalarda, asitli yiyecek ve içeceklerin eroziv etkilerinin azaltılmasında, aşağıdakilerden hangisinin tavsiye edilmesi uygun değildir?
2. Asidik yiyecek ve içeceklerin gece yatmadan önce tüketilmesinden kaçınılması
3. Asitli yiyecek ve içeceklerin tüketilmesinden hemen sonra dişlerin fırçalanması
4. Tüketimden sonra, tükürük akış hızının artırılması için şekersiz sakız çiğnenmesi
5. Asitli içeceklerin hızlı tüketilerek ağızda kalma süresinin kısaltılması
6. Öğünlerin, asit nötralize edici süt ve peynir gibi ürünlerle bitirilmesi

Doğru cevap: B

1. Dentin yapısıyla ilgili aşağıdaki ifadelerden hangisi doğrudur?
2. Dentin tübüllerinin sayısı, pulpadan mine-dentin sınırına doğru artar.
3. Dentin tübüllerinin ortalama çapı, pulpadan mine-dentin sınırına doğru artar.
4. İntertübüler dentin, peritübüler dentinden daha az mineralizedir.
5. Dentin lenfinin hareketi, mine-dentin sınırından pulpaya doğrudur.
6. Tersiyer dentin, Whitlockite kristallerinin tübülleri tıkaması sonucunda oluşan hipermineralize dentindir.

Doğru cevap: C

1. Yirmi yaş dişleri hariç eksik dişi bulunmayan 22 yaşındaki hastanın maksiller sağ 1 ve 2. Premolar dişlerinde oklüzal çürük, mandibular sol 1 ve 2. Premolar dişlerinde iki yüzlü kompozit restorasyon ve maksiller sol 1. molar dişinde ise üç yüzlü amalgam restorasyon bulunuyor.

Bu hastanın DMF(T) indeks değeri kaçtır?

1. 5
2. 7
3. 9
4. 11
5. 13

Doğru cevap: A

1. Aşağıdakilerden hangisi tükürüğün organik bileşenlerinden biri değildir?
2. Laktoferrin
3. Peroksidaz
4. Asetil sistein
5. Lizozim
6. Statherin

Doğru cevap: C

1. Amalgamı oluşturan aşağıdaki bileşenlerden hangisi nem kontaminasyonu sonucunda oluşan gecikmiş genleşmeden esas olarak sorumludur?
2. Kalay
3. Cıva
4. Bakır
5. Çinko
6. Gümüş

Doğru cevap: D

1. Smear tabakasıyla ilgili aşağıdaki ifadelerden hangisi yanlıştır?
2. Smear tabakasının yapısında plak, bakteri, tükürük ve kan bulunabilir.
3. Kavite preparasyonu için kullanılan farklı yöntemler, smear tabakasının kalınlığını ve morfolojisini etkiler.
4. Kavitenin hava-su spreyi ile basınçla yıkanıp kurutulması smear tabakasını uzaklaştırır.
5. Smear tabakasının uzaklaştırılmasıyla dentinin ıslanabilirliği artar.
6. Smear tabakasının varlığı dentin geçirgenliğini azaltır.

Doğru cevap: C

1. I. Trietilen glikol dimetakrilat (TEG-DMA)

II. Siloran

III. Kamforkinon

IV. Magnezyum oksit

Yukarıdakilerden hangileri kompozit rezin içindeki monomer yapılardandır?

1. II ve IV
2. I ve III
3. I ve II
4. I, III ve IV
5. I, II ve III

Doğru cevap: C

1. Kompozit rezinlerin yapısında bulunan doldurucu partiküllerle ilgili aşağıdaki ifadelerden hangisi yanlıştır?
2. Doldurucu partikül miktarının artması, kompozit rezinin fiziksel özelliklerini geliştirir.
3. Doldurucu partikül miktarının azalması, kompozit rezinin polimerizasyon büzülmesinin azalmasına neden olur.
4. Doldurucu partikül miktarının artması kompozit rezinin su emilimini azaltır.
5. Doldurucu partikül miktarının azalması, kompozit rezinin ısısal genleşme katsayısını artırır.
6. Stronsiyum ve çinko gibi ağır metaller içeren cam doldurucu partikül miktarının artması, kompozit rezinin radyoopasitesini artırır.

Doğru cevap: B

1. I. Bakterilerin restorasyon yüzeyine tutunması

engellenir.

II. Oksijen inhibisyon tabakası ortadan kaldırılır.

III. Nanofil kompozitler hibrit kompozitlere göre daha az parlatılabilir.

Bir kompozit rezin restorasyona yapılacak bitirme ve parlatma işlemleriyle ilgili yukarıdaki ifadelerden hangileri doğrudur?

1. Yalnız I
2. Yalnız II
3. I ve III
4. I ve II
5. I, II ve III

Doğru cevap: D

1. Sekiz senedir profesyonel yüzücü olan ve günlük antrenmanlarını düşük pH’li gaz ile klorlanmış havuzda yoğun bir tempoda yapan 28 yaşındaki sağlıklı erkek bireyde aşağıdaki diş aşınmalarından hangisinin görülmesi en olasıdır?
2. Abrazyon
3. Patolojik atrizyon
4. Fizyolojik atrizyon
5. Erozyon
6. Abfraksiyon

Doğru cevap: D

1. Sklerotik dentinle ilgili aşağıdaki ifadelerden hangisi yanlıştır?
2. Normal dentinden daha az geçirgendir.
3. Yaş ile birlikte miktarı artar.
4. Adeziv sistemlerle normal dentinden daha kuvvetli bağlanma dayanımı elde edilir.
5. Yoğun skleroza uğramış alanlardaki hipermineralize tübüllere adeziv uygulaması sırasında daha uzun süre asitle pürüzlendirme yapılabilir.
6. Klinik görünümü genellikle parlak (camsı) ve transparandır.

Doğru cevap: C

1. Minenin kırılmasını engelleyecek şekilde prizma gruplarının değişik yönlerde yerleşmesiyle oluşan optik görüntüye ne ad verilir?
2. Retzius çizgisi
3. Hunter-Schreger bandı
4. Mine lameli
5. Perikimata
6. Mine tuğu

Doğru cevap: B

1. I.Doğal şeker alkolüdür.
2. Streptococcus mutans tarafından fermente edilemez.
3. Biyofilm içindeki Streptococcus mutans miktarını azaltır.

Ksilitol ile ilgili yukarıdaki ifadelerden hangileri doğrudur?

1. I, II ve III
2. Yalnız II
3. I ve III
4. II ve III
5. I ve II

Doğru cevap: A

1. I. Düz yüzeylerde başlangıç lezyonları genellikle mine-sement birleşiminin koronalinde yer alıp,

gingival marjinleri sağlam mine dokusu ile çevrili olabilir.

II. İntrinsik kaynaklı lezyonlara genellikle maksiller dişlerin lingual yüzeylerinde rastlanır.

III. Erozyona uğramış dişte mevcut restorasyon varlığında, restorasyonun, etrafındaki diş

dokusundan daha yüksekte kaldığı gözlenebilir.

IV. Dişlerde hipersensitivite oluşturabilir.

Yukarıdaki bulgulardan hangileri dişlerde görülen erozyon lezyonlarının klinik tablosunda

karşılaşılması olası durumlardandır?

1. I, II ve III
2. I, II ve IV
3. I, III ve IV
4. II, III ve IV
5. I, II, III ve IV

Doğru cevap: E

1. Aşağıdakilerden hangisi tükürüğün yapısında bulunmaz?
2. Protein
3. Üre
4. Kalsiyum
5. Elektrolit
6. Kazein

Doğru cevap: E

1. Aşağıdakilerden hangisi rezin modifiye cam iyonomer simanın yapısında bulunup geleneksel cam iyonomer simanın yapısında bulunmaz?
2. Tartarik asit
3. Su
4. Floroalüminosilikat cam
5. Hidrofilik metakrilat monomer
6. Poliakrilik asit

Doğru cevap: D

1. I. Self-etch, etch-and-rinse ve selektif-etch adezyon stratejileri ile kullanılabilirler.

II. Birçoğu hidroksiapatite iyonik olarak bağlanan 10-MDP monomeri içerir.

III. İndirekt restorasyonlar için kullanılamazlar.

Universal adezivlerle ilgili yukarıdaki ifadelerden hangileri doğrudur?

1. I ve II
2. Yalnız III
3. I ve III
4. I, II ve III
5. Yalnız I

Doğru cevap: A

1. Aşağıdaki durumların hangisinde rezin infiltrasyon tekniğiyle tedavi önerilmez?
2. Florozis vakalarında
3. Kavitasyon gösteren kök yüzeyi çürüklerinde
4. Hipomineralizasyon vakalarında
5. Arayüz başlangıç çürüklerinde
6. Beyaz nokta (white spot) lezyonlarında

Doğru cevap: B

1. Kompozit rezinlerde organik ve inorganik fazları birbirine bağlayarak stres dağılımını sağlayan içerik aşağıdakilerden hangisidir?
2. Kamforokinon
3. Tersiyer amin
4. Trietilen glikol dimetakrilat
5. Baryum cam
6. Silan

Doğru cevap: E

1. Diş renklenmelerinin tedavisinde uygulanan mikroabrazyon işleminde aşağıdakilerden hangisi kullanılır?
2. Ortofosforik asit
3. Maleik asit
4. Sitrik asit
5. Hidroklorik asit
6. Hidroflorik asit

Doğru cevap: D

1. Dentin aşırı hassasiyeti tedavisinde kullanılan aşağıdaki ajanlardan hangisi sinir desensitizasyonu yaparak etki eder?
2. Glutaraldehit
3. Potasyum nitrat
4. Potasyum okzalat
5. Arjinin
6. Florür

Doğru cevap: B

1. Pulpadaki odontoblast hücrelerine komşu, mineralize olmamış dentin tabakasına ne ad verilir?
2. Manto dentin
3. Sirkumpulpal dentin
4. Sekonder dentin
5. Primer dentin
6. Predentin

Doğru cevap: E

1. Aşağıdaki mikroorganizmalardan hangisi oral streptokokların mutans grubuna ait değildir?
2. Streptococcus salivarius
3. Streptococcus sobrinus
4. Streptococcus ferus
5. Streptococcus ratti
6. Streptococcus criceti

Doğru cevap: A

1. Sement dokusuyla ilgili aşağıdaki ifadelerden hangisi doğrudur?
2. Dentinden daha serttir.
3. Ağırlıkça %80-85’i inorganik yapıdan oluşmaktadır.
4. Formasyonu hayat boyu devam eder.
5. Kendini tamir etme kapasitesine sahip değildir.
6. Vasküler bir yapıya sahiptir.

Doğru cevap: C

1. Aşağıdaki tükürük proteinlerinden hangisi lubrikasyonda etkilidir?
2. Histatin
3. Laktoferrin
4. Müsin
5. Peroksidaz
6. Sistatin

Doğru cevap: C

1. Yüksek bakırlı amalgamlarda korozyon olayının az görülmesinin en olası nedeni aşağıdakilerden hangisidir?
2. Gama 2 fazının olmaması
3. Knoop sertlik değerlerinin çok düşük olması
4. Boyutsal değişikliğinin çok yüksek olması
5. Gama 1 fazının olması
6. Karıştırma süresinin kısa olması

Doğru cevap: A

1. Aşağıdakilerden hangisi anterior dişlerin restorasyonu ve yeniden şekillendirilmesinde kılavuz olarak dikkate alınması gereken referans noktalarından biri değildir?
2. Yüz orta hattı
3. Üst dudak kurvatürü
4. İnsizal embraşürler
5. Gülümseme hattı
6. Spee eğrisi

Doğru cevap: E

1. I. Lazer floresans

II. Quartz Tungsten Halojen

III. LED

IV. Argon lazer

Yukarıdaki ışık yayma özelliği olan cihazlardan hangileri kompozit restorasyonların

polimerizasyonunda kullanılır?

1. Yalnız IV
2. I ve III
3. I ve II
4. I, III ve IV
5. II, III ve IV

Doğru cevap: E

1. I. Yüzey tabakasının hemen altında karanlık tabaka

bulunur.

II. Pulpaya en yakın tabaka şeffaf tabakadır.

III. Lezyon gövdesi her mine çürüğünde olmayabilir.

IV. Lezyon gövdesiyle şeffaf tabaka arasında karanlık

tabaka bulunur.

Mine çürüğüyle ilgili yukarıdaki ifadelerden hangileri doğrudur?

1. I ve II
2. I ve III
3. II ve IV
4. II ve III
5. I ve IV

Doğru cevap: C

1. Self-etch adeziv sistemlerde dentin yüzeyindeki kalsiyum ile suda çözünmeyen stabil tuzlar oluşturarak kimyasal bağlanma sağlayabilme özelliğine sahip fonksiyonel monomer aşağıdakilerden hangisidir?
2. HEMA
3. 10-MDP
4. Bis-GMA
5. TEGDMA
6. UDMA

Doğru cevap: B
